# Supplementary material for: Biguanide–transition metals complexes as potential drug for hyperglycemia treatment
Source: PubMed Central journal article supplement — RSC Adv. 2020 Jun 16;10(38):22856–63. doi: 10.1039/d0ra04059b (PMC9054726; doi:10.1039/d0ra04059b), 2020-06-16

## SUPPORTING INFORMATION

### Biguanide-Transition Metals Complexes as Potential Drug for Hyperglycemia Treatment

Stephanny Villamizar,<sup>a</sup> Laura Porras Osorio,<sup>a</sup> Octavio Piñeros,<sup>a</sup> Javier Ellena,<sup>b</sup> Norman Balcazar,<sup>c,d</sup>  
Ruben E. Varela-Miranda,<sup>a</sup> Richard F. D’Vries,<sup>a\*</sup>

<sup>a</sup> Facultad de Ciencias Básicas, Universidad Santiago de Cali, Calle 5 # 62-00, Cali, Colombia. E-mail: [richard.dvries00@usc.edu.co](mailto:richard.dvries00@usc.edu.co)

<sup>b</sup> São Carlos Institute of Physics, University of São Paulo, CEP 13.566-590, São Carlos, SP, Brazil

<sup>c</sup> Molecular Genetics Group, Universidad de Antioquia, Calle 70, N° 52-21, A.A. 1226, Medellín, Colombia.

<sup>d</sup> Department of Physiology and Biochemistry, School of Medicine, Universidad de Antioquia, Calle 70, N° 52-21, A.A. 1226, Medellín, Colombia.

**Section S1.** IR spectroscopy for  $[\text{Co}(\text{C}_4\text{H}_{12}\text{N}_5)_3]\text{Cl}_2 \cdot 2\text{H}_2\text{O}$ ,  $[\text{Ni}(\text{C}_4\text{H}_{11}\text{N}_5)_2]\text{Cl} \cdot \text{H}_2\text{O}$ ,  $[\text{Cu}(\text{C}_4\text{H}_{12}\text{N}_5)_2]\text{Cl}_2 \cdot \text{H}_2\text{O}$  and  $[\text{Zn}(\text{C}_4\text{H}_{11}\text{N}_5)\text{Cl}_3]$  compounds.

**Section S2.** TGA and DSC analysis for  $[\text{Co}(\text{C}_4\text{H}_{12}\text{N}_5)_3]\text{Cl}_2 \cdot 2\text{H}_2\text{O}$ ,  $[\text{Ni}(\text{C}_4\text{H}_{11}\text{N}_5)_2]\text{Cl} \cdot \text{H}_2\text{O}$ ,  $[\text{Cu}(\text{C}_4\text{H}_{12}\text{N}_5)_2]\text{Cl}_2 \cdot \text{H}_2\text{O}$  and  $[\text{Zn}(\text{C}_4\text{H}_{11}\text{N}_5)\text{Cl}_3]$  compounds.

**Section S1.** IR spectroscopy for  $[\text{Co}(\text{C}_4\text{H}_{12}\text{N}_5)_3]\text{Cl}_2 \cdot 2\text{H}_2\text{O}$ ,  $[\text{Ni}(\text{C}_4\text{H}_{11}\text{N}_5)_2]\text{Cl} \cdot \text{H}_2\text{O}$ ,  $[\text{Cu}(\text{C}_4\text{H}_{12}\text{N}_5)_2]\text{Cl}_2 \cdot \text{H}_2\text{O}$  and  $[\text{Zn}(\text{C}_4\text{H}_{11}\text{N}_5)\text{Cl}_3]$  complexes.

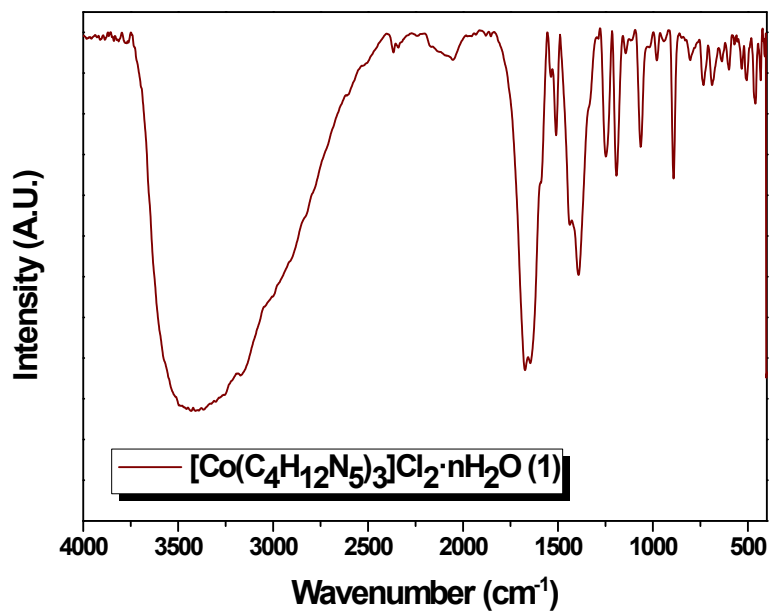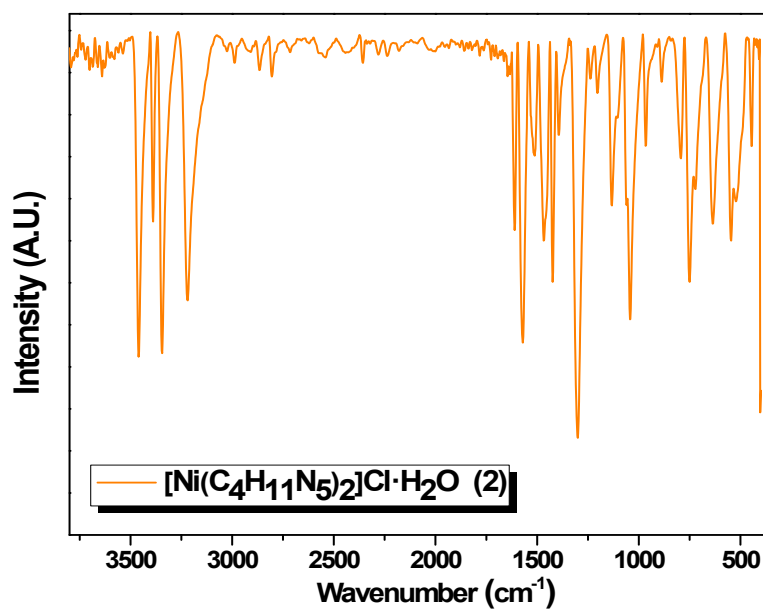

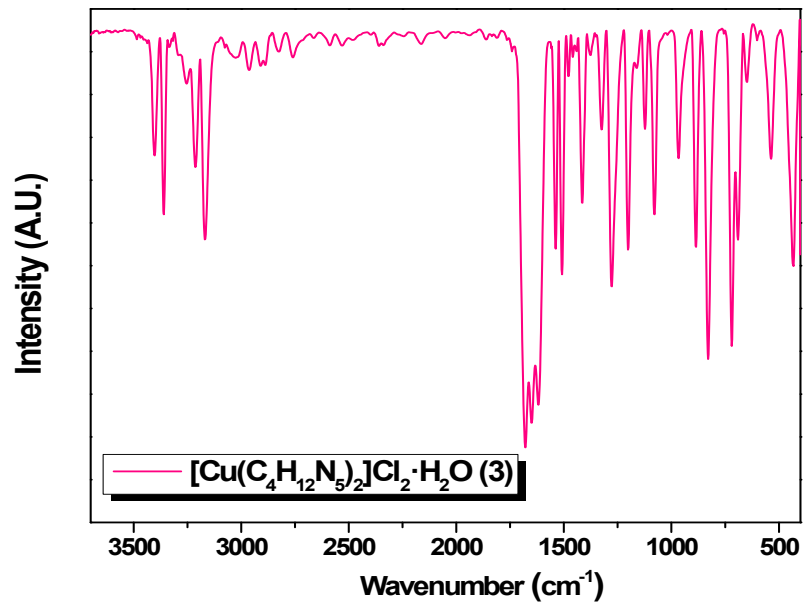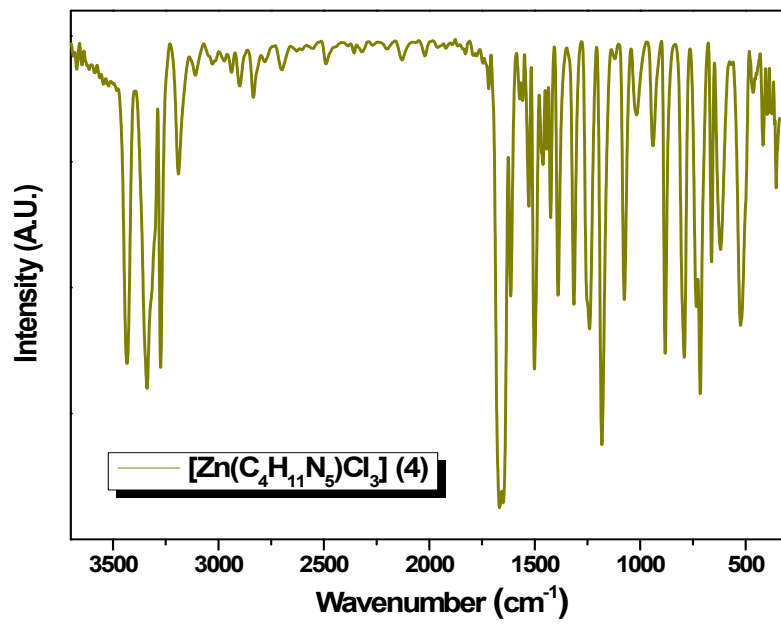

**Section S2.** TGA and DSC analysis for  $[\text{Co}(\text{C}_4\text{H}_{12}\text{N}_5)_3]\text{Cl}_2 \cdot 2\text{H}_2\text{O}$ ,  $[\text{Ni}(\text{C}_4\text{H}_{11}\text{N}_5)_2]\text{Cl} \cdot \text{H}_2\text{O}$ ,  $[\text{Cu}(\text{C}_4\text{H}_{12}\text{N}_5)_2]\text{Cl}_2 \cdot \text{H}_2\text{O}$  and  $[\text{Zn}(\text{C}_4\text{H}_{11}\text{N}_5)\text{Cl}_3]$  complexes.

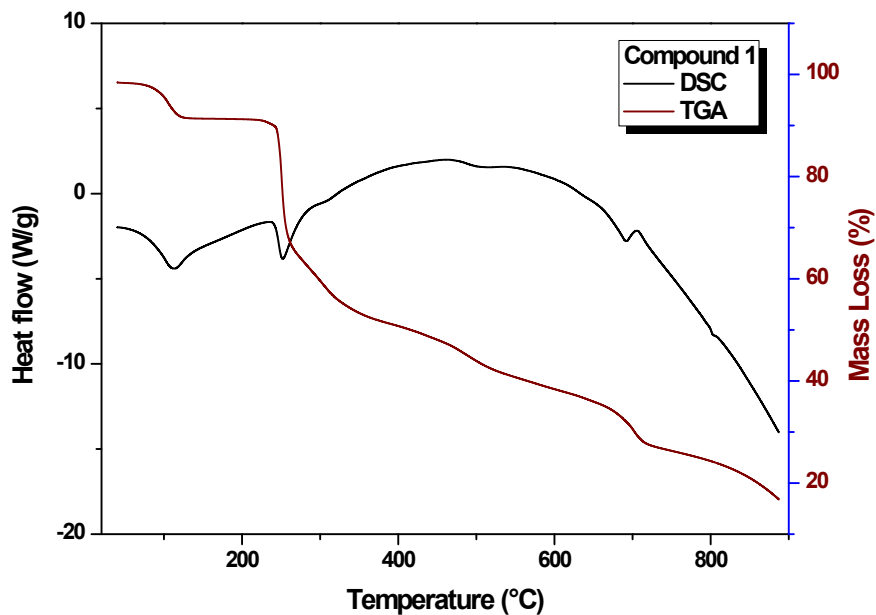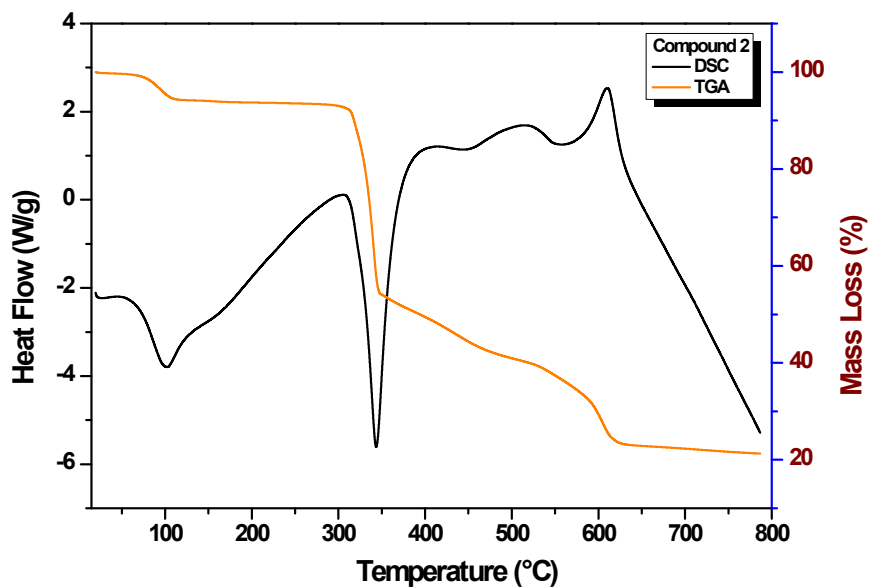

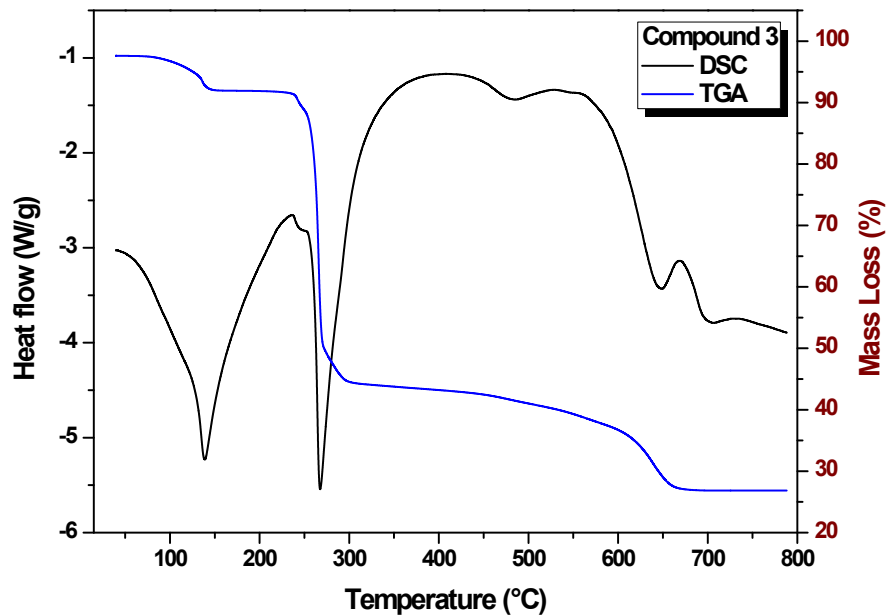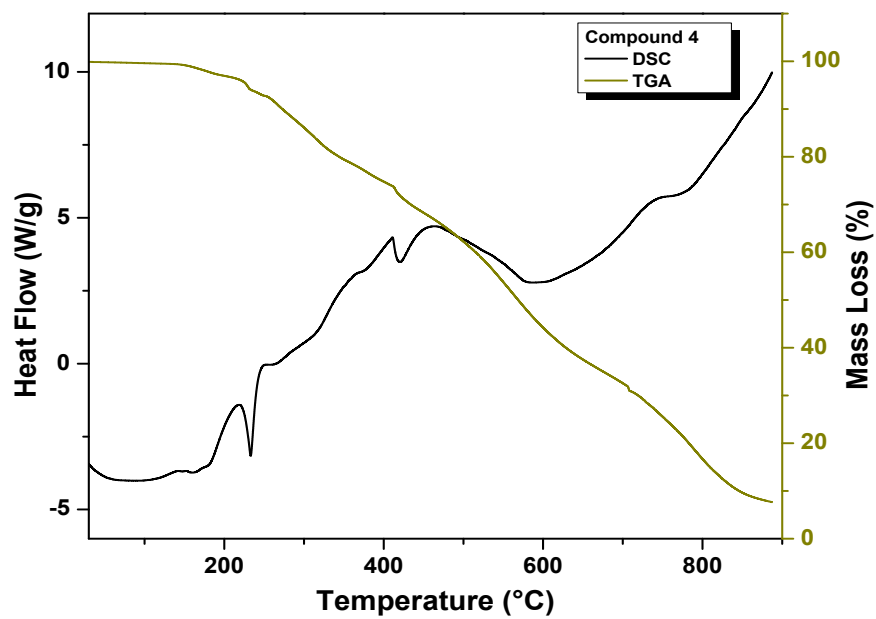

Supplement: RA-010-D0RA04059B-s001.pdf [file RA-010-D0RA04059B-s001.pdf]
